# Supplementary material for: BNT162b2 COVID-19 Vaccine Hesitancy among Parents of 4023 Young Adolescents (12–15 Years) in Qatar
Source: MDPI journal article supplement (doi:10.3390/vaccines9090981), 2021-09-02
Supplement: s1 [file s1]

**Table S1. Nationalities and vaccine acceptance rates per nationality of the parents of young adolescents aged 12-15 years.**

| Nationality | Number (%)          | Acceptante rate (%) | Nationality   | Number (%) | Acceptante rate (%) | Nationality   | Number (%)        | Acceptante rate (%) |
|-------------|---------------------|---------------------|---------------|------------|---------------------|---------------|-------------------|---------------------|
| Indian      | <b>1149 (28.57)</b> | 88.51               | Nigerian      | 6 (0.15)   | -                   | Bosnian       | 1 (0.02)          | -                   |
| Egyptian    | <b>698 (17.35)</b>  | 80.37               | Somali        | 5 (0.12)   | -                   | Cameroonian   | 1 (0.02)          | -                   |
| Filipino    | <b>391 (9.72)</b>   | 87.72               | Afghan        | 4 (0.10)   | -                   | Chadian       | 1 (0.02)          | -                   |
| Jordanian   | <b>305 (7.58)</b>   | 72.46               | Libyan        | 4 (0.10)   | -                   | Cypriot       | 1 (0.02)          | -                   |
| Qatari      | <b>305 (7.58)</b>   | 65.25               | Portuguese    | 4 (0.10)   | -                   | Dominican     | 1 (0.02)          | -                   |
| Pakistani   | 211 (5.25)          | <b>92.42</b>        | Ethiopian     | 3 (0.07)   | -                   | Eritrean      | 1 (0.02)          | -                   |
| Sudanese    | 178 (4.43)          | 82.58               | Omani         | 3 (0.07)   | -                   | Ghanaian      | 1 (0.02)          | -                   |
| Syrian      | 105 (2.61)          | 75.24               | Saudi         | 3 (0.07)   | -                   | Italian       | 1 (0.02)          | -                   |
| Lebanese    | 91 (2.26)           | 84.62               | Spanish       | 3 (0.07)   | -                   | Kuwaiti       | 1 (0.02)          | -                   |
| Iranian     | 89 (2.21)           | 69.66               | Albanian      | 2 (0.05)   | -                   | Maldivian     | 1 (0.02)          | -                   |
| Tunisian    | 84 (2.09)           | 76.19               | Australian    | 2 (0.05)   | -                   | Nicaraguan    | 1 (0.02)          | -                   |
| Palestinian | 79 (1.96)           | 72.15               | Bahraini      | 2 (0.05)   | -                   | Norwegian     | 1 (0.02)          | -                   |
| Yemeni      | 49 (1.22)           | 71.43               | Chilean       | 2 (0.05)   | -                   | Salvadoran    | 1 (0.02)          | -                   |
| Bangladeshi | 31 (0.77)           | 93.55               | Djiboutian    | 2 (0.05)   | -                   | Serbian       | 1 (0.02)          | -                   |
| American    | 29 (0.72)           | 89.66               | Finnish       | 2 (0.05)   | -                   | South African | 1 (0.02)          | -                   |
| British     | 28 (0.70)           | 85.71               | Hungarian     | 2 (0.05)   | -                   | South Korean  | 1 (0.02)          | -                   |
| Algerian    | 22 (0.55)           | <b>59.09</b>        | Irish         | 2 (0.05)   | -                   | Tanzanian     | 1 (0.02)          | -                   |
| Indonesian  | 22 (0.55)           | 90.91               | Kazakhs       | 2 (0.05)   | -                   | <b>Total</b>  | <b>4023 (100)</b> |                     |
| Malaysian   | 13 (0.32)           | 100                 | Netherlands   | 2 (0.05)   | -                   |               |                   |                     |
| Moroccan    | 11 (0.27)           | 81.82               | New Zealander | 2 (0.05)   | -                   |               |                   |                     |
| Iraqi       | 10 (0.25)           | 90.00               | Polish        | 2 (0.05)   | -                   |               |                   |                     |
| Canadian    | 7 (0.17)            | -                   | Singaporean   | 2 (0.05)   | -                   |               |                   |                     |
| Greek       | 7 (0.17)            | -                   | Ukrainian     | 2 (0.05)   | -                   |               |                   |                     |
| Brazilian   | 6 (0.15)            | -                   | Venezuelan    | 2 (0.05)   | -                   |               |                   |                     |
| French      | 6 (0.15)            | -                   | Austrian      | 1 (0.02)   | -                   |               |                   |                     |
| German      | 6 (0.15)            | -                   | Belizean      | 1 (0.02)   | -                   |               |                   |                     |
| Mauritanian | 6 (0.15)            | -                   | Bolivian      | 1 (0.02)   | -                   |               |                   |                     |

Vaccine acceptance rates were calculated only for nationalities including  $\geq 10$  participants.
